# Supplementary material for: Distinct epigenetic programs regulate cardiac myocyte development and disease in the human heart in vivo
Source: PubMed Central journal article supplement (PMC5786002; doi:10.1038/s41467-017-02762-z), 2018-01-26
Supplement: 41467_2017_2762_MOESM3_ESM.pdf [file 41467_2017_2762_MOESM3_ESM.pdf]

## **Description of Additional Supplementary Files**

**File Name: Supplementary Data 1**

Description: Patient characteristics.

**File Name: Supplementary Data 2**

Description: Sequencing statistics.

**File Name: Supplementary Data 3**

Description: Genes with pronounced genic mCpG and GO analysis.

**File Name: Supplementary Data 4**

Description: LMRs with differential mCpG in fetal and adult non-failing cardiac myocytes.
